# Supplementary material for: MRI-Based Radiomic Features Help Identify Lesions and Predict Histopathological Grade of Hepatocellular Carcinoma
Source: MDPI journal article supplement (doi:10.3390/diagnostics12051085), 2022-04-26
Supplement: s1 [file s1]

## Supplementary Materials

### Section S1. Selected features after Spearman correlation filter and Wilcoxon rank-sum test steps of feature selection.

| <i>Feature Type</i>             | <i>Feature name</i>                                                                                                                                                                                                                                                                                                                               |
|---------------------------------|---------------------------------------------------------------------------------------------------------------------------------------------------------------------------------------------------------------------------------------------------------------------------------------------------------------------------------------------------|
| Shape<br>[n = 14]               | shape Flatness<br>shape Sphericity<br>Maximum2D Diameter Row<br>shape MeshVolume<br>shape Elongation<br>shape Maximum2DDiameterColumn<br>shape VoxelVolume<br>shape SurfaceArea<br>shape MinorAxisLength<br>shape Maximum3DDiameter<br>shape MajorAxisLength<br>shape LeastAxisLength<br>shape SurfaceVolumeRatio<br>shape Maximum2DDiameterSlice |
| First Order<br>[n = 18]         | Skewness<br>Maximum<br>MeanAbsoluteDeviation<br>Kurtosis<br>Range<br>Energy<br>InterquartileRange<br>Variance<br>Mean<br>10Percentile<br>90Percentile<br>Uniformity<br>Median<br>RobustMeanAbsoluteDeviation<br>RootMeanSquared<br>Minimum<br>TotalEnergy<br>Entropy                                                                              |
| Second order (GLCM)<br>[n = 24] | glcm SumSquares<br>glcm Contrast<br>glcm InverseVariance<br>glcm ClusterTendency<br>glcm DifferenceAverage<br>glcm Idm<br>glcm ClusterShade<br>glcm Imc2<br>glcm Idn<br>glcm ClusterProminence<br>glcm Id<br>glcm Imc1<br>glcm Autocorrelation<br>glcm SumEntropy<br>glcm MaximumProbability<br>glcm MCC<br>glcm Correlation<br>glcm JointEntropy |

|                                         |                                                                                                                                                                                                                                                                                                                                                                                                                                                                                                                                       |
|-----------------------------------------|---------------------------------------------------------------------------------------------------------------------------------------------------------------------------------------------------------------------------------------------------------------------------------------------------------------------------------------------------------------------------------------------------------------------------------------------------------------------------------------------------------------------------------------|
|                                         | glcm Idmn<br>glcm JointAverage<br>glcm SumAverage<br>glcm DifferenceEntropy<br>glcm DifferenceVariance<br>glcm JointEnergy                                                                                                                                                                                                                                                                                                                                                                                                            |
| <b>Second Order (GLRLM)</b><br>[n = 16] | glrlm ShortRunHighGrayLevelEmphasis<br>glrlm RunLengthNonUniformity<br>glrlm ShortRunEmphasis<br>glrlm LongRunLowGrayLevelEmphasis<br>glrlm RunPercentage<br>glrlm GrayLevelVariance<br>glrlm LowGrayLevelRunEmphasis<br>glrlm GrayLevelNonUniformity<br>glrlm RunVariance<br>glrlm LongRunHighGrayLevelEmphasis<br>glrlm ShortRunLowGrayLevelEmphasis<br>glrlm RunLengthNonUniformityNormalized<br>glrlm LongRunEmphasis<br>glrlm GrayLevelNonUniformityNormalized<br>glrlm HighGrayLevelRunEmphasis<br>glrlm RunEntropy             |
| <b>Second Order (GLSZM)</b><br>[n = 16] | glszm SizeZoneNonUniformity<br>glszm LargeAreaEmphasis<br>glszm SmallAreaEmphasis<br>glszm ZonePercentage<br>glszm GrayLevelVariance<br>glszm LargeAreaLowGrayLevelEmphasis<br>glszm GrayLevelNonUniformity<br>glszm SmallAreaHighGrayLevelEmphasis<br>glszm ZoneVariance<br>glszm LargeAreaHighGrayLevelEmphasis<br>glszm HighGrayLevelZoneEmphasis<br>glszm SizeZoneNonUniformityNormalized<br>glszm ZoneEntropy<br>glszm SmallAreaLowGrayLevelEmphasis<br>glszm GrayLevelNonUniformityNormalized<br>glszm LowGrayLevelZoneEmphasis |
| <b>Second Order (NGTDM)</b><br>[n = 5]  | ngtdm Coarseness<br>ngtdm Strength<br>ngtdm Busyness<br>ngtdm Complexity<br>ngtdm Contrast                                                                                                                                                                                                                                                                                                                                                                                                                                            |
| <b>Second Order (GLDM)</b><br>[n = 14]  | gldm<br>LargeDependenceLowGrayLevelEmphasis<br>gldm DependenceNonUniformity<br>gldm<br>SmallDependenceLowGrayLevelEmphasis<br>gldm LowGrayLevelEmphasis<br>gldm<br>LargeDependenceHighGrayLevelEmphasis<br>gldm DependenceEntropy<br>gldm DependenceVariance<br>gldm GrayLevelVariance<br>gldm GrayLevelNonUniformity<br>gldm SmallDependenceEmphasis<br>gldm LargeDependenceEmphasis                                                                                                                                                 |

|  |                                                                                                                      |
|--|----------------------------------------------------------------------------------------------------------------------|
|  | gldm<br>SmallDependenceHighGrayLevelEmphasis<br>gldm HighGrayLevelEmphasis<br>gldm DependenceNonUniformityNormalized |
|--|----------------------------------------------------------------------------------------------------------------------|

**Table S1.** Extracted radiomic features. First (n=18) and second order features (n = 75) were extracted from T2 and arterial, portal and tardive post-contrast phases of DCE-MRI images, for a total of 93 features for each of the four MRI images. For each VOI, a total of 386 radiomic features were extracted.

## Section S2. PyRadiomics parameter file

#Brancato et al. - Parameter file for feature extraction with PyRadiomics - August 2021

# MRI-based radiomic features help identify lesions and predict histopathological grade of hepatocellular carcinoma

```
imageType:
  Original: {}
```

```
featureClass:
  shape:
  firstorder:
  glcm:
  glrlm:
  glszm:
  gldm:
  ngtdm:
```

```
setting:
  # Normalization:
  normalize: true
  normalizeScale: 100 # This allows you to use more or less the same bin width.

  # Image discretization:
  # The ideal number of bins is somewhere in the order of 16-128 bins. Binwidth
  was defined by extracting firstorder:Range from the dataset to analyze, and
  choosing a binwidth so, that range/binwidth remains approximately
  # in this range of bins (applied on T2, ART, PORT, TARD images).
  binWidth = 6

  # first order specific settings:
  # When normalizing, gray values below the mean will be negative. Shifting by
  300 (3 StdDevs * 100) ensures that the
  # majority of voxels is positive (only outliers >3 SD lower than the mean will
  be negative).
  voxelArrayShift: 300

  # Misc:
  # label value
  label: 1
```

### Section S3. Selected features after Spearman correlation filter and Wilcoxon rank-sum test steps of feature selection.

|                                                    |
|----------------------------------------------------|
| SHAPE shape Sphericity                             |
| SHAPE shape Elongation                             |
| ART glcm Cluster Shade                             |
| ART glrlm Long Run High Gray Level Emphasis        |
| ART gldm Large Dependence Low Gray Level Emphasis  |
| ART glszm Small Area Low Gray Level Emphasis       |
| ART firstorder Minimum                             |
| ART firstorder Kurtosis                            |
| ART firstorder Skewness                            |
| PORT gldm Large Dependence Low Gray Level Emphasis |
| PORT glszm SmallAreaEmphasis                       |
| PORT glszm SmallAreaLowGrayLevelEmphasis           |
| PORT firstorder Kurtosis                           |
| TARD glrlm RunVariance                             |
| TARD glszm SmallAreaEmphasis                       |
| TARD firstorder 10Percentile                       |
| TARD firstorder Kurtosis                           |
| T2 glcm Idn                                        |
| T2 glcm MCC                                        |
| T2 glcm Imc1                                       |
| T2 glrlm ShortRunEmphasis                          |
| T2 glrlm LongRunHighGrayLevelEmphasis              |
| T2 gldm DependenceNonUniformityNormalized          |
| T2 glszm SizeZoneNonUniformityNormalized           |
| T2 glszm SmallAreaLowGrayLevelEmphasis             |
| T2 firstorder Minimum                              |
| ART ngtdm Strength                                 |
| TARD ngtdm Strength                                |
| T2 ngtdm Strength                                  |

**Table S2.** 29 selected features after Wilcoxon rank-sum test for HCC/HT classification task.

|                                               |
|-----------------------------------------------|
| SHAPE shape Sphericity                        |
| SHAPE shape Elongation                        |
| ART glcm ClusterShade                         |
| ART glrlm LongRunHighGrayLevelEmphasis        |
| ART gldm LargeDependenceLowGrayLevelEmphasis  |
| ART glszm SizeZoneNonUniformityNormalized     |
| ART glszm SmallAreaLowGrayLevelEmphasis       |
| ART firstorder Minimum                        |
| ART firstorder Kurtosis                       |
| ART firstorder Skewness                       |
| PORT gldm LargeDependenceLowGrayLevelEmphasis |
| PORT glszm SizeZoneNonUniformityNormalized    |
| PORT glszm SmallAreaEmphasis                  |
| PORT glszm SmallAreaLowGrayLevelEmphasis      |

|                                             |
|---------------------------------------------|
| PORT firstorder Kurtosis                    |
| TARD glrlm RunVariance                      |
| TARD glszm SmallAreaEmphasis                |
| TARD firstorder 10Percentile                |
| TARD firstorder Kurtosis                    |
| T2 glcm Idn                                 |
| T2 glcm MCC                                 |
| T2 glcm Imc1                                |
| T2 glrlm ShortRunEmphasis                   |
| T2 glrlm LongRunHighGrayLevelEmphasis       |
| T2 gldm LargeDependenceLowGrayLevelEmphasis |
| T2 gldm DependenceNonUniformityNormalized   |
| T2 glszm SizeZoneNonUniformityNormalized    |
| T2 glszm SmallAreaEmphasis                  |
| T2 glszm SmallAreaLowGrayLevelEmphasis      |
| T2 firstorder 10Percentile                  |
| T2 firstorder Minimum                       |
| ART ngtdm Strength                          |
| TARD ngtdm Strength                         |
| T2 ngtdm Strength                           |

**Table S3.** 34 selected features after paired Wilcoxon signed-rank test for HCC/HT classification task.

|                                               |
|-----------------------------------------------|
| ART glszm SizeZoneNonUniformityNormalized     |
| PORT glcm MaximumProbability                  |
| PORT gldm LargeDependenceLowGrayLevelEmphasis |
| PORT glszm SmallAreaLowGrayLevelEmphasis      |
| TARD glszm SizeZoneNonUniformityNormalized    |
| T2 glszm LowGrayLevelZoneEmphasis             |

**Table S4.** 6 selected features after Wilcoxon rank-sum test for G1+G2/G3 classification task.

|                              |
|------------------------------|
| ART firstorder 10Percentile  |
| ART firstorder Skewness      |
| PORT firstorder Skewness     |
| TARD firstorder Maximum      |
| T2 gldm LowGrayLevelEmphasis |
| PORT ngtdm Strength          |

**Table S5.** 6 selected features after Wilcoxon rank-sum test for G1/G2 classification task.

|                                               |
|-----------------------------------------------|
| SHAPE shape SurfaceVolumeRatio                |
| ART glcm ClusterShade                         |
| ART firstorder Skewness                       |
| PORT glcm MaximumProbability                  |
| TARD gldm LargeDependenceLowGrayLevelEmphasis |
| T2 gldm LargeDependenceHighGrayLevelEmphasis  |

**Table S6.** 6 selected features after Wilcoxon rank-sum test for G1/G3 classification task.

|                                               |
|-----------------------------------------------|
| PORT glcm MaximumProbability                  |
| PORT gldm LargeDependenceLowGrayLevelEmphasis |
| PORT glszm ZonePercentage                     |
| PORT glszm LargeAreaLowGrayLevelEmphasis      |

|                                        |
|----------------------------------------|
| TARD glrlm LongRunLowGrayLevelEmphasis |
| PORT ngtdm Complexity                  |

**Table S7.** 6 selected features after Wilcoxon rank-sum test for G2/G3 classification task.

## Section S4. Prediction performances of multivariable logistic regression models.

| Order | Features                                                                                           | AUC $\pm$ SE      | SEN $\pm$ SE      | SPEC $\pm$ SE     | ACC $\pm$ SE      | MCC $\pm$ SE      |
|-------|----------------------------------------------------------------------------------------------------|-------------------|-------------------|-------------------|-------------------|-------------------|
| 1     | T2 gldm DNUN                                                                                       | 0.943 $\pm$ 0.002 | 0.895 $\pm$ 0.004 | 0.9 $\pm$ 0.003   | 0.897 $\pm$ 0.002 | 0.695 $\pm$ 0.005 |
| 2     | T2 gldm DNUN<br>T2 glrlm LRHGLE                                                                    | 0.958 $\pm$ 0.001 | 0.939 $\pm$ 0.003 | 0.905 $\pm$ 0.002 | 0.919 $\pm$ 0.002 | 0.768 $\pm$ 0.004 |
| 3     | T2 gldm DNUN<br>T2 glrlm LRHGLE<br>ART firstorder<br>Minimum                                       | 0.957 $\pm$ 0.001 | 0.926 $\pm$ 0.004 | 0.903 $\pm$ 0.002 | 0.913 $\pm$ 0.002 | 0.731 $\pm$ 0.005 |
| 4     | T2 gldm DNUN<br>T2 glrlm LRHGLE<br>ART firstorder<br>Minimum<br>ART gldm LDLGLE                    | 0.953 $\pm$ 0.002 | 0.907 $\pm$ 0.005 | 0.917 $\pm$ 0.003 | 0.914 $\pm$ 0.002 | 0.733 $\pm$ 0.005 |
| 5     | T2 gldm DNUN<br>T2 glrlm LRHGLE<br>ART firstorder<br>Minimum<br>ART gldm LDLGLE<br>T2 glszm SALGLE | 0.949 $\pm$ 0.002 | 0.899 $\pm$ 0.005 | 0.903 $\pm$ 0.003 | 0.903 $\pm$ 0.002 | 0.739 $\pm$ 0.006 |

**Table S8.** Results of multivariate analysis for HT/HCC classification task. For each model (from order 1 to 5), AUC, sensitivity, specificity and accuracy were reported with the standard error on a 95% confidence interval over all bootstrap sample. Abbreviations: T2 = features extracted from T2 images; ART = features extracted from arterial post-contrast phase of DCE-MRI; PORT = features extracted from portal post-contrast phase of DCE-MRI; TARD = features extracted from tardive post-contrast phase of DCE-MRI; DNNU = Dependence Non Uniformity Normalized; LRHGLE = Long Run High Gray Level Emphasis; LDLGLE = Large Dependence Low Gray Level Emphasis; SALGLE = Small Area Low Gray Level Emphasis.

| Order | Features                                                                                   | AUC $\pm$ SE      | SEN $\pm$ SE      | SPEC $\pm$ SE     | ACC $\pm$ SE      | MCC $\pm$ SE      |
|-------|--------------------------------------------------------------------------------------------|-------------------|-------------------|-------------------|-------------------|-------------------|
| 1     | PORT glcm MP                                                                               | 0.743 $\pm$ 0.006 | 0.668 $\pm$ 0.015 | 0.564 $\pm$ 0.013 | 0.605 $\pm$ 0.006 | 0.224 $\pm$ 0.02  |
| 2     | ART glszm SZNUN<br>T2 glszm LGLZE                                                          | 0.75 $\pm$ 0.006  | 0.644 $\pm$ 0.011 | 0.647 $\pm$ 0.009 | 0.643 $\pm$ 0.005 | 0.263 $\pm$ 0.017 |
| 3     | ART glszm SZNUN<br>T2 glszm LGLZE<br>PORT glcm MP                                          | 0.733 $\pm$ 0.006 | 0.638 $\pm$ 0.011 | 0.677 $\pm$ 0.009 | 0.66 $\pm$ 0.005  | 0.3 $\pm$ 0.016   |
| 4     | PORT gldm LDLGLE<br>PORT glcm MP<br>T2 glszm LGLZE<br>ART glszm SZNUN                      | 0.743 $\pm$ 0.007 | 0.638 $\pm$ 0.012 | 0.688 $\pm$ 0.009 | 0.668 $\pm$ 0.005 | 0.278 $\pm$ 0.02  |
| 5     | PORT gldm LDLGLE<br>PORT glcm MP<br>T2 glszm LGLZE<br>ART glszm SZNUN<br>PORT glszm SALGLE | 0.717 $\pm$ 0.007 | 0.633 $\pm$ 0.012 | 0.69 $\pm$ 0.009  | 0.669 $\pm$ 0.005 | 0.234 $\pm$ 0.047 |

**Table S9.** Results of multivariate analysis for G1+G2/G3 classification task. For each model (from order 1 to 5), AUC, sensitivity, specificity and accuracy were reported with the standard error on a 95% confidence interval over all

bootstrap sample. Abbreviations: T2 = features extracted from T2 images; ART = features extracted from arterial post-contrast phase of DCE-MRI; PORT = features extracted from portal post-contrast phase of DCE-MRI; TARD = features extracted from tardive post-contrast phase of DCE-MRI; LDLGLE = Large Dependence Low Gray Level Emphasis; MP = Maximum Probability; LGLZE = Low Gray Level Zone Emphasis; SZNUN = Size Zone Non Uniformity Normalized; SALGLE = Small Area Low Gray Level Emphasis.

| Order | Features                                                                                                                       | AUC $\pm$ SE      | SEN $\pm$ SE      | SPEC $\pm$ SE     | ACC $\pm$ SE      | MCC $\pm$ SE      |
|-------|--------------------------------------------------------------------------------------------------------------------------------|-------------------|-------------------|-------------------|-------------------|-------------------|
| 1     | PORT ngtdm Strength                                                                                                            | 0.909 $\pm$ 0.004 | 0.83 $\pm$ 0.006  | 0.665 $\pm$ 0.015 | 0.79 $\pm$ 0.005  | 0.468 $\pm$ 0.018 |
| 2     | T2 gldm LGLE<br>ART firstorder<br>10Percentile                                                                                 | 0.959 $\pm$ 0.004 | 0.894 $\pm$ 0.007 | 0.736 $\pm$ 0.018 | 0.862 $\pm$ 0.005 | 0.631 $\pm$ 0.018 |
| 3     | PORT ngtdm Strength<br>T2 gldm LGLE<br>ART firstorder<br>10Percentile                                                          | 0.942 $\pm$ 0.006 | 0.916 $\pm$ 0.005 | 0.717 $\pm$ 0.022 | 0.879 $\pm$ 0.005 | 0.617 $\pm$ 0.023 |
| 4     | PORT ngtdm Strength<br>T2 gldm LGLE<br>ART firstorder<br>10Percentile<br>TARD firstorder<br>Maximum                            | 0.939 $\pm$ 0.006 | 0.9 $\pm$ 0.007   | 0.807 $\pm$ 0.018 | 0.884 $\pm$ 0.006 | 0.664 $\pm$ 0.021 |
| 5     | PORT ngtdm Strength<br>T2 gldm LGLE<br>ART firstorder<br>10Percentile<br>TARD firstorder<br>Maximum<br>ART firstorder Skewness | 0.919 $\pm$ 0.007 | 0.88 $\pm$ 0.007  | 0.798 $\pm$ 0.018 | 0.865 $\pm$ 0.006 | 0.609 $\pm$ 0.021 |

**Table S10.** Results of multivariate analysis for G1/G2 classification task. For each model (from order 1 to 5), AUC, sensitivity, specificity and accuracy were reported with the standard error on a 95% confidence interval over all bootstrap sample. Abbreviations: T2 = features extracted from T2 images; ART = features extracted from arterial post-contrast phase of DCE-MRI; PORT = features extracted from portal post-contrast phase of DCE-MRI; TARD = features extracted from tardive post-contrast phase of DCE-MRI; LGLE = Low Gray Level Emphasis.

| Order | Features                                                                                    | AUC $\pm$ SE      | SEN $\pm$ SE      | SPEC $\pm$ SE     | ACC $\pm$ SE      | MCC $\pm$ SE      |
|-------|---------------------------------------------------------------------------------------------|-------------------|-------------------|-------------------|-------------------|-------------------|
| 1     | ART firstorder Skewness                                                                     | 0.858 $\pm$ 0.005 | 0.826 $\pm$ 0.007 | 0.508 $\pm$ 0.016 | 0.747 $\pm$ 0.005 | 0.264 $\pm$ 0.05  |
| 2     | PORT glcm MP<br>ART firstorder Skewness                                                     | 0.885 $\pm$ 0.005 | 0.826 $\pm$ 0.006 | 0.7 $\pm$ 0.016   | 0.799 $\pm$ 0.004 | 0.489 $\pm$ 0.016 |
| 3     | T2 gldm LDHGLE<br>ART firstorder Skewness<br>PORT glcm MP                                   | 0.886 $\pm$ 0.007 | 0.843 $\pm$ 0.009 | 0.755 $\pm$ 0.015 | 0.828 $\pm$ 0.006 | 0.583 $\pm$ 0.016 |
| 4     | T2 gldm LDHGLE<br>ART firstorder Skewness<br>PORT glcm MP<br>ART glcm CS                    | 0.851 $\pm$ 0.008 | 0.783 $\pm$ 0.01  | 0.745 $\pm$ 0.016 | 0.782 $\pm$ 0.007 | 0.484 $\pm$ 0.02  |
| 5     | ART firstorder Skewness<br>PORT glcm MP<br>T2 gldm LDHGLE<br>ART glcm CS<br>SHAPE shape SVR | 0.812 $\pm$ 0.009 | 0.741 $\pm$ 0.011 | 0.702 $\pm$ 0.017 | 0.742 $\pm$ 0.008 | 0.354 $\pm$ 0.025 |

**Table S11.** Results of multivariate analysis for G1 /G3 classification task. For each model (from order 1 to 5), AUC, sensitivity, specificity and accuracy were reported with the standard error on a 95% confidence interval over all bootstrap sample. Abbreviations: T2 = features extracted from T2 images; ART = features extracted from arterial post-

contrast phase of DCE-MRI; PORT = features extracted from portal post-contrast phase of DCE-MRI; MP = Maximum Probability; SVR = Surface Volume Ratio; LDHGLE = Large Dependence High Gray Level Emphasis; CS = Cluster Shade.

| Order | Features                                                                                             | AUC $\pm$ SE      | SEN $\pm$ SE      | SPEC $\pm$ SE     | ACC $\pm$ SE      | MCC $\pm$ SE      |
|-------|------------------------------------------------------------------------------------------------------|-------------------|-------------------|-------------------|-------------------|-------------------|
| 1     | PORT ngtdm Complexity                                                                                | 0.707 $\pm$ 0.006 | 0.569 $\pm$ 0.01  | 0.661 $\pm$ 0.012 | 0.609 $\pm$ 0.005 | 0.165 $\pm$ 0.06  |
| 2     | PORT ngtdm Complexity<br>PORT glszm LALGLE                                                           | 0.709 $\pm$ 0.006 | 0.609 $\pm$ 0.01  | 0.664 $\pm$ 0.013 | 0.63 $\pm$ 0.006  | 0.237 $\pm$ 0.026 |
| 3     | PORT ngtdm Complexity<br>PORT glszm LALGLE<br>TARD glrlm LRLGLE                                      | 0.693 $\pm$ 0.007 | 0.605 $\pm$ 0.009 | 0.674 $\pm$ 0.012 | 0.638 $\pm$ 0.005 | 0.215 $\pm$ 0.029 |
| 4     | PORT ngtdm Complexity<br>PORT glszm LALGLE<br>TARD glrlm LRLGLE<br>PORT gldm LDLGLE                  | 0.663 $\pm$ 0.006 | 0.613 $\pm$ 0.009 | 0.639 $\pm$ 0.013 | 0.628 $\pm$ 0.006 | 0.187 $\pm$ 0.03  |
| 5     | PORT gldm LDLGLE<br>PORT ngtdm Complexity<br>PORT glszm ZP<br>TARD glrlm LRLGLE<br>PORT glszm LALGLE | 0.641 $\pm$ 0.007 | 0.616 $\pm$ 0.01  | 0.598 $\pm$ 0.013 | 0.614 $\pm$ 0.006 | 0.103 $\pm$ 0.033 |

**Table S12.** Results of multivariate analysis for G2/G3 classification task. For each model (from order 1 to 5), AUC, sensitivity, specificity and accuracy were reported with the standard error on a 95% confidence interval over all bootstrap sample. Abbreviations: T2 = features extracted from T2 images; ART = features extracted from arterial post-contrast phase of DCE-MRI; PORT = features extracted from portal post-contrast phase of DCE-MRI; LALGLE = Large Area Low Gray Level Emphasis; LRLGLE = Long Run Low Gray Level Emphasis; ZP = Zone Percentage; LDLGLE = Large Dependence Low Gray Level Emphasis.

## Section S5. Results of DeLong test with Bonferroni correction.

| TASK – HCC vs HT   |       |         |
|--------------------|-------|---------|
| Models             | p     | 95% CI  |
| 1-2                | 0.303 | 0-0.12  |
| 1-3                | 0.393 | 0-0.114 |
| 1-4                | 0.282 | 0-0.114 |
| 1-5                | 0.244 | 0-0.032 |
| 2-3                | 0.34  | 0-0.034 |
| 2-4                | 0.372 | 0-0.017 |
| 2-5                | 0.346 | 0-0.18  |
| 3-4                | 0.4   | 0-0.058 |
| 3-5                | 0.271 | 0-0.141 |
| 4-5                | 0.362 | 0-0.033 |
| TASK – G1+G2 vs G3 |       |         |
| Models             | p     | 95% CI  |
| 1-2                | 0.762 | 0-0.16  |
| 1-3                | 0.387 | 0-0.128 |
| 1-4                | 0.234 | 0-0.111 |
| 1-5                | 0.211 | 0-0.116 |
| 2-3                | 0.196 | 0-0.064 |



|                        |       |         |
|------------------------|-------|---------|
| 2-4                    | 0.293 | 0-0.086 |
| 2-5                    | 0.315 | 0-0.097 |
| 3-4                    | 0.645 | 0-0.045 |
| 3-5                    | 0.599 | 0-0.066 |
| 4-5                    | 0.726 | 0-0.04  |
| <b>TASK – G1 vs G2</b> |       |         |
| Models                 | p     | 95% CI  |
| 1-2                    | 0.271 | 0-0.141 |
| 1-3                    | 0.199 | 0-0.141 |
| 1-4                    | 0.152 | 0-0.144 |
| 1-5                    | 0.152 | 0-0.144 |
| 2-3                    | 0.4   | 0-0.031 |
| 2-4                    | 0.332 | 0-0.053 |
| 2-5                    | 0.332 | 0-0.053 |
| 3-4                    | 0.4   | 0-0.031 |
| 3-5                    | 0.4   | 0-0.031 |
| 4-5                    | 0.4   | 0-0.031 |
| <b>TASK – G1 vs G3</b> |       |         |
| Models                 | p     | 95% CI  |
| 1-2                    | 0.34  | 0-0.178 |
| 1-3                    | 0.299 | 0-0.187 |
| 1-4                    | 0.552 | 0-0.204 |
| 1-5                    | 0.346 | 0-0.18  |
| 2-3                    | 0.4   | 0-0.058 |
| 2-4                    | 0.742 | 0-0.147 |
| 2-5                    | 0.828 | 0-0.112 |
| 3-4                    | 0.607 | 0-0.141 |
| 3-5                    | 0.816 | 0-0.104 |
| 4-5                    | 0.105 | 0-0.315 |
| <b>TASK – G2 vs G3</b> |       |         |
| Models                 | p     | 95% CI  |
| 1-2                    | 0.34  | 0-0.178 |
| 1-3                    | 0.299 | 0-0.187 |
| 1-4                    | 0.552 | 0-0.204 |
| 1-5                    | 0.346 | 0-0.18  |
| 2-3                    | 0.4   | 0-0.058 |
| 2-4                    | 0.742 | 0-0.147 |
| 2-5                    | 0.828 | 0-0.112 |
| 3-4                    | 0.607 | 0-0.141 |
| 3-5                    | 0.816 | 0-0.104 |
| 4-5                    | 0.105 | 0-0.315 |

**Table S13.** Results of DeLong test with Bonferroni correction for each pair of models built for each classification task. p-values (p) for the difference in AUC and 95 % confidence interval (CI) for the difference in AUCs were reported.

## Section S6. Supplementary analysis for AJCC stage prediction.

In order to investigate the ability of T2 and DCE-MRI radiomic features in predicting AJCC stage, two classification tasks were investigated: stage I and II versus stage III and IV (I-II/III-IV classification task) and stage I versus II, III, and IV (I/II-III-IV classification task). Procedures described in the “Radiomic feature selection” and “Multivariable prediction model building and analysis” paragraphs were used. As reported in the following Tables, the step I and step II of feature selection returned respectively 51 and 10 (for I-II/III-IV), 53 and 8 (for I/II-III-IV). For I-II/III-IV classification task, the simplest multivariable model best prediction performances were reached by the second order model (AUC = 86%, sen = 65%, spec = 82%, acc = 77%). For I-II/III-IV classification task, the simplest multivariable model best prediction performances were reached by the second order model (AUC = 77%, sen = 75%, spec = 65%, acc = 72%). However, these

results must be interpreted with caution since there were multiple changes to the AJCC classification over the time period during which HCC specimens were collected (resulting in differences in the pathologic AJCC staging criteria across different editions). This constitutes a limitation in using AJCC stage as outcome. In particular, the AJCC TNM classifications used across cases in the TCGA-LIHC dataset range from the 5th through the 7th editions, resulting in inconsistency in the meaning of the pathologic T, N, and M categories across different patients examined during different time periods. These inconsistencies could also justify the differences in prediction performances obtained when the early stage group included stage I and II patients with respect to those obtained when the early stage group included only stage I patients.

#### S6.2 Prediction performances of multivariable logistic regression models.

|                                                    |
|----------------------------------------------------|
| ART_original_glcml_InverseVariance                 |
| ART_original_firstorder_Skewness                   |
| PORT_original_firstorder_10Percentile              |
| PORT_original_firstorder_Kurtosis                  |
| PORT_original_firstorder_Skewness                  |
| TARD_original_firstorder_Kurtosis                  |
| T2_original_glcml_InverseVariance                  |
| T2_original_gldm_DependenceNonUniformityNormalized |
| T2_original_glszm_SizeZoneNonUniformityNormalized  |
| T2_original_glszm_SmallAreaEmphasis                |

**Table S14.** 10 selected features after Wilcoxon rank-sum test for I-II/III-IV classification task.

|                                                     |
|-----------------------------------------------------|
| SHAPE_original_shape_SurfaceVolumeRatio             |
| ART_original_firstorder_Skewness                    |
| PORT_original_glszm_SizeZoneNonUniformityNormalized |
| PORT_original_firstorder_10Percentile               |
| TARD_original_glszm_SizeZoneNonUniformityNormalized |
| TARD_original_firstorder_Skewness                   |
| T2_original_glszm_SizeZoneNonUniformityNormalized   |
| T2_original_glszm_SmallAreaHighGrayLevelEmphasis    |

**Table S15.** 8 selected features after Wilcoxon rank-sum test for I/II-III-IV classification task.

#### S6.2 Prediction performances of multivariable logistic regression models.

| Order | Features                                                                                         | AUC $\pm$ SE      | SEN $\pm$ SE      | SPEC $\pm$ SE     | ACC $\pm$ SE      | MCC $\pm$ SE      |
|-------|--------------------------------------------------------------------------------------------------|-------------------|-------------------|-------------------|-------------------|-------------------|
| 1     | T2 glszm SZNUN                                                                                   | 0.818 $\pm$ 0.004 | 0.517 $\pm$ 0.016 | 0.808 $\pm$ 0.006 | 0.744 $\pm$ 0.004 | 0.258 $\pm$ 0.019 |
| 2     | T2 glszm SZNUN<br>PORT firstorder<br>10Percentile                                                | 0.859 $\pm$ 0.005 | 0.646 $\pm$ 0.013 | 0.815 $\pm$ 0.005 | 0.775 $\pm$ 0.004 | 0.386 $\pm$ 0.015 |
| 3     | T2 glszm SZNUN<br>PORT firstorder<br>10Percentile<br>PORT firstorder<br>Kurtosis                 | 0.857 $\pm$ 0.005 | 0.656 $\pm$ 0.014 | 0.795 $\pm$ 0.006 | 0.765 $\pm$ 0.004 | 0.381 $\pm$ 0.016 |
| 4     | T2 glszm SZNUN<br>PORT firstorder<br>10Percentile<br>PORT firstorder<br>Kurtosis<br>T2 glszm SAE | 0.82 $\pm$ 0.007  | 0.61 $\pm$ 0.015  | 0.789 $\pm$ 0.006 | 0.753 $\pm$ 0.005 | 0.328 $\pm$ 0.017 |
| 5     | T2 glszm SZNUN<br>PORT firstorder                                                                | 0.788 $\pm$ 0.008 | 0.6 $\pm$ 0.016   | 0.779 $\pm$ 0.006 | 0.743 $\pm$ 0.005 | 0.283 $\pm$ 0.018 |

|  |                                                                            |  |  |  |  |  |
|--|----------------------------------------------------------------------------|--|--|--|--|--|
|  | 10Percentile<br>PORT firstorder<br>Kurtosis<br>T2 glszm SAE<br>ART glcm IV |  |  |  |  |  |
|--|----------------------------------------------------------------------------|--|--|--|--|--|

**Table S16.** Results of multivariate analysis for I-II/III-IV classification task. For each model (from order 1 to 5), AUC, sensitivity, specificity and accuracy were reported with the standard error on a 95% confidence interval over all bootstrap sample. Abbreviations: T2 = features extracted from T2 images; ART = features extracted from arterial post-contrast phase of DCE-MRI; PORT = features extracted from portal post-contrast phase of DCE-MRI; SZNUN = Size Zone Non Uniformity Normalized; SAE = Small Area Emphasis; IV = Inverse Variance.

| Order | Features                                                                                                                           | AUC ± SE      | SEN ± SE      | SPEC ± SE     | ACC ± SE      | MCC ± SE      |
|-------|------------------------------------------------------------------------------------------------------------------------------------|---------------|---------------|---------------|---------------|---------------|
| 1     | PORT firstorder<br>10Percentile                                                                                                    | 0.737 ± 0.006 | 0.709 ± 0.01  | 0.561 ± 0.012 | 0.655 ± 0.006 | 0.265 ± 0.017 |
| 2     | TARD firstorder<br>Skewness<br>PORT firstorder<br>10Percentile                                                                     | 0.762 ± 0.006 | 0.746 ± 0.008 | 0.565 ± 0.012 | 0.683 ± 0.005 | 0.293 ± 0.016 |
| 3     | T2 glszm SAHGLE<br>TARD firstorder<br>Skewness<br>PORT firstorder<br>10Percentile                                                  | 0.771 ± 0.007 | 0.752 ± 0.007 | 0.645 ± 0.012 | 0.715 ± 0.005 | 0.372 ± 0.016 |
| 4     | T2 glszm SAHGLE<br>TARD firstorder<br>Skewness<br>PORT firstorder<br>10Percentile<br>SHAPE shape SVR                               | 0.751 ± 0.007 | 0.725 ± 0.007 | 0.622 ± 0.012 | 0.691 ± 0.005 | 0.29 ± 0.018  |
| 5     | T2 glszm SAHGLE<br>TARD firstorder<br>Skewness<br>PORT firstorder<br>10Percentile<br>SHAPE shape SVR<br>ART firstorder<br>Skewness | 0.723 ± 0.008 | 0.725 ± 0.007 | 0.603 ± 0.013 | 0.687 ± 0.005 | 0.264 ± 0.019 |

**Table S17.** Results of multivariate analysis for I/II-III-IV classification task. For each model (from order 1 to 5), AUC, sensitivity, specificity and accuracy were reported with the standard error on a 95% confidence interval over all bootstrap sample. Abbreviations: T2 = features extracted from T2 images; ART = features extracted from arterial post-contrast phase of DCE-MRI; PORT = features extracted from portal post-contrast phase of DCE-MRI; SAHGLE = Small Area High Gray Level Emphasis; SVR = Surface Volume Ratio.

### S6.3 Equations for predictive logistic regression models.

$$g_{I-II/III-IV}(x_i) = 2.04 \times (\text{PORT ngtdm Complexity}) - 1.77 \times (\text{PORT glszm Large Area Low Gray Level Emphasis}) - 0.64$$

$$g_{I/II-III-IV}(x_i) = 1.24 \times (\text{T2 glszm SAHGLE}) + 1.16 \times (\text{TARD firstorder Skewness}) - 1.15 \times (\text{PORT firstorder 10Percentile}) - 0.52$$

### S6.4 Results of DeLong test with Bonferroni correction for each pair of models built for each classification task (I-II/III-IV and I/II-III-IV).

| TASK – I+II vs III+IV |   |        |
|-----------------------|---|--------|
| Models                | p | 95% CI |

|                              |       |          |
|------------------------------|-------|----------|
| 1-2                          | 0.122 | 0-0.101  |
| 1-3                          | 0.118 | 0-0.110  |
| 1-4                          | 0.203 | 0-0.105  |
| 1-5                          | 0.145 | 0-0.113  |
| 2-3                          | 0.773 | 0-0.0540 |
| 2-4                          | 0.726 | 0-0.0450 |
| 2-5                          | 0.884 | 0-0.0540 |
| 3-4                          | 0.332 | 0-0.0320 |
| 3-5                          | 0.779 | 0-0.0280 |
| 4-5                          | 0.308 | 0-0.0380 |
| <b>TASK – I vs II+III+IV</b> |       |          |
| Models                       | p     | 95% CI   |
| 1-2                          | 0.324 | 0-0.137  |
| 1-3                          | 0.204 | 0-0.17   |
| 1-4                          | 0.212 | 0-0.179  |
| 1-5                          | 0.191 | 0-0.181  |
| 2-3                          | 0.269 | 0-0.08   |
| 2-4                          | 0.198 | 0-0.084  |
| 2-5                          | 0.248 | 0-0.088  |
| 3-4                          | 0.828 | 0-0.031  |
| 3-5                          | 0.884 | 0-0.046  |
| 4-5                          | 0.515 | 0-0.031  |
